# Supplementary material for: Structure of the Discoidin Domain Receptor 1 Extracellular Region Bound to an Inhibitory Fab Fragment Reveals Features Important for Signaling
Source: PubMed Central journal article supplement (PMC3320712; doi:10.1016/j.str.2012.02.011), 2012-04-04
Supplement: mmc1.pdf [file mmc1.pdf]

## **Supplemental Information**

### **Structure of the Discoidin Domain Receptor 1**

#### **Extracellular Region Bound to an Inhibitory Fab**

#### **Fragment Reveals Features Important for Signaling**

Federico Carafoli, Marie Cathrin Mayer, Kazushige Shiraishi, Mira Anguelova

Pecheva, Lai Yi Chan, Ruodan Nan, Birgit Leitinger, and Erhard Hohenester

#### **Inventory of Supplemental Information**

**Figure S1:** related to Figure 1.

**Figure S2:** related to Figure 3.

**Figure S3:** related to Figure 3.

**Figure S4:** related to Figure 6.

Figure S1

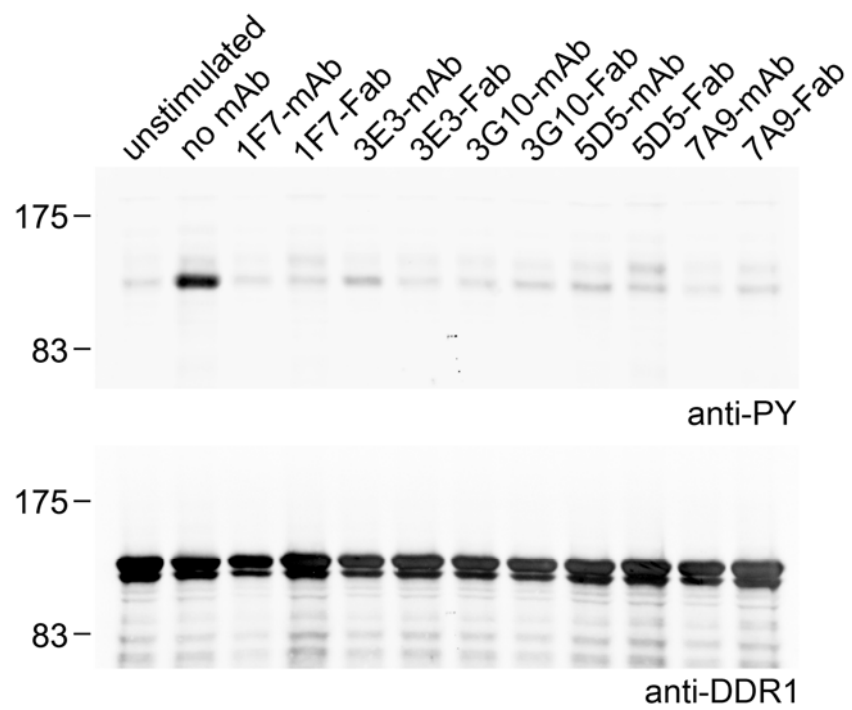

Figure S2

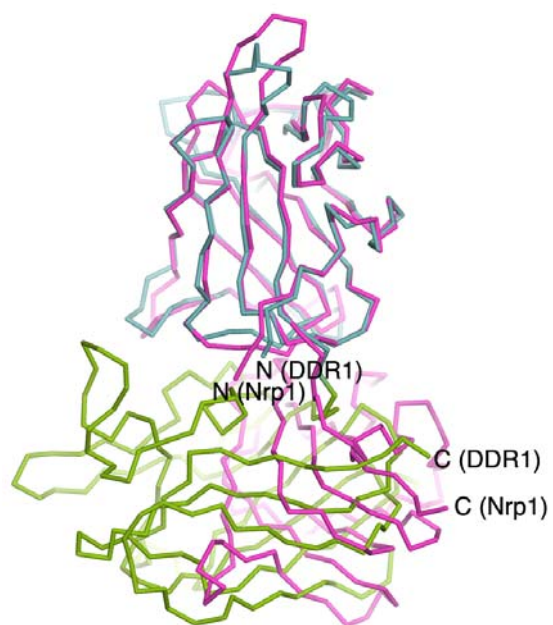

Figure S3

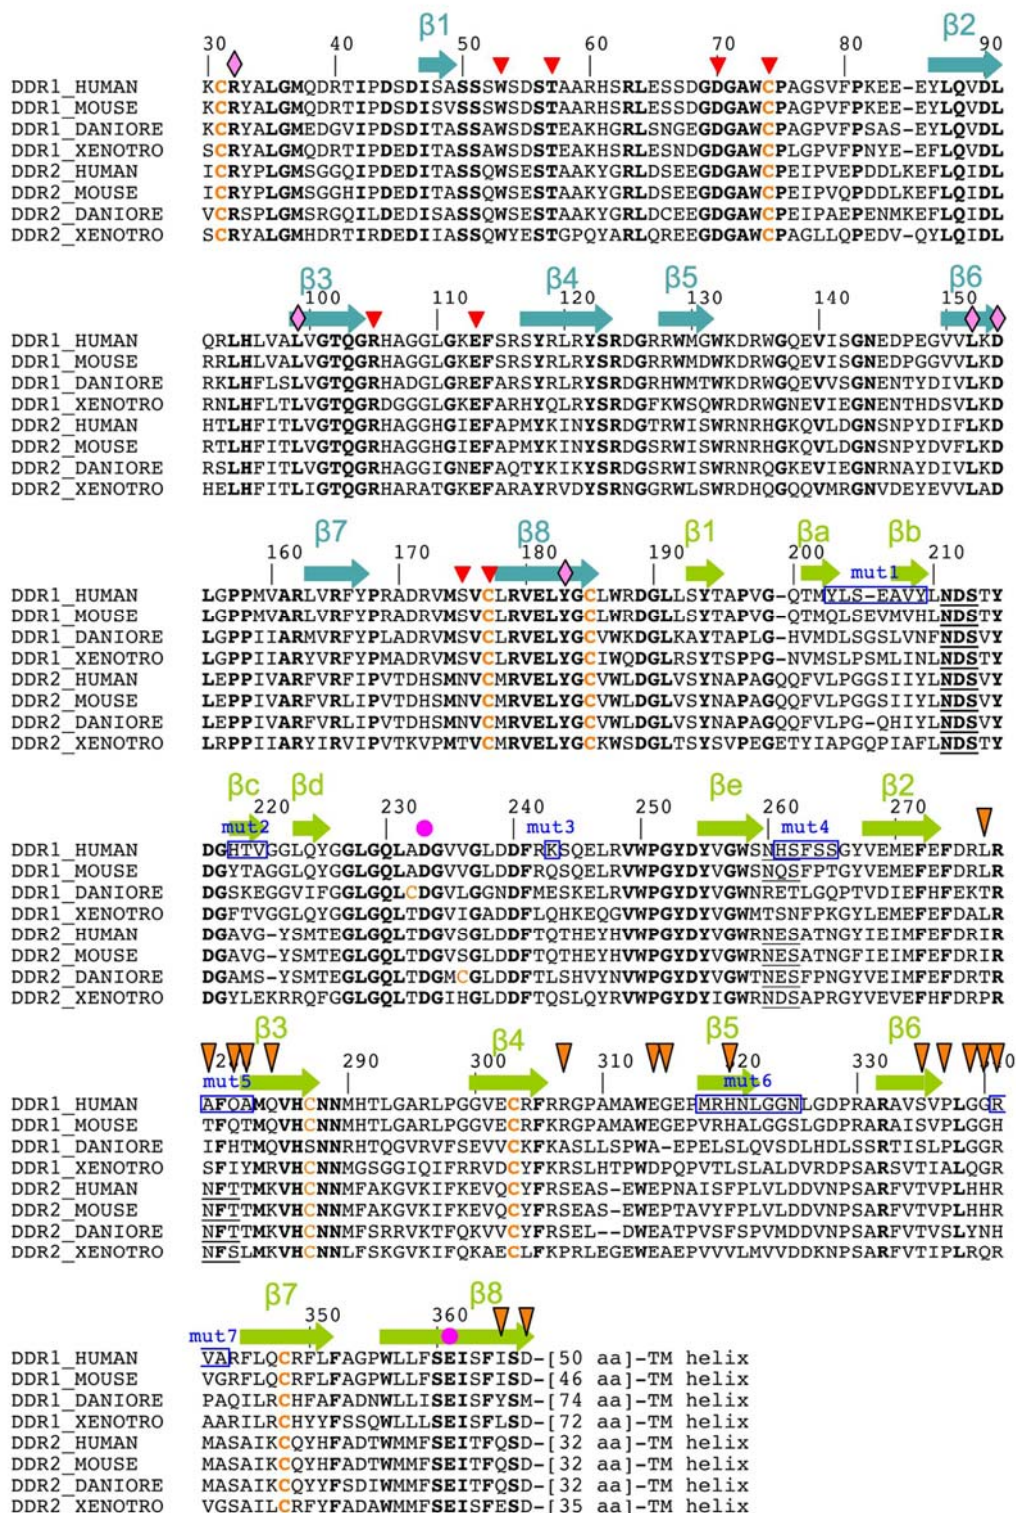

Figure S4

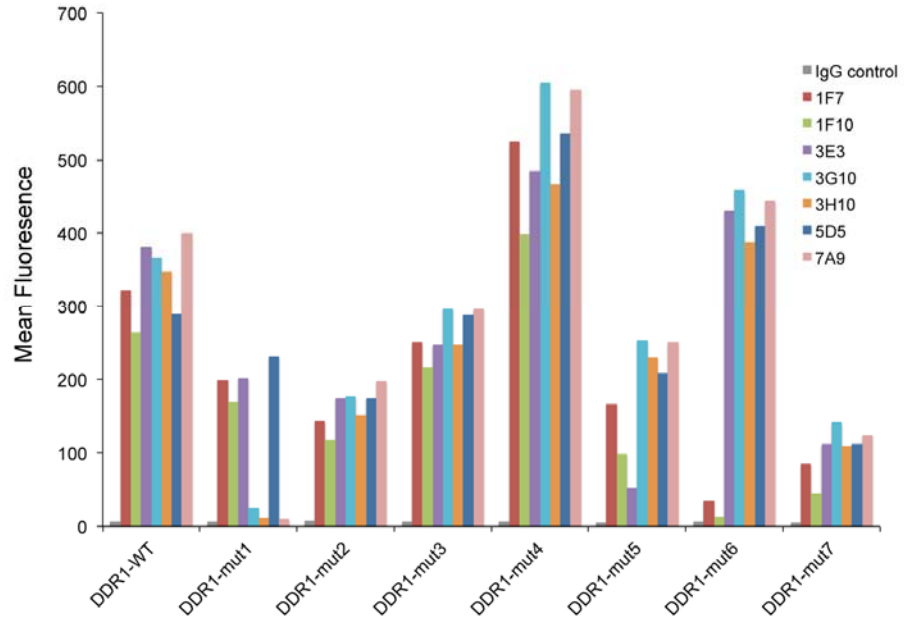

## SUPPLEMENTAL FIGURE LEGENDS

**Figure S1, related to Figure 1.** Selected Fab fragments block collagen-induced DDR1 phosphorylation. DDR1b was transiently expressed in HEK293 cells. The cells were stimulated for 90 min at 37° C with 10 µg/ml collagen I in the presence or absence of the indicated anti-DDR1 mAbs or Fab fragments (at 10 µg/ml). Aliquots of cell lysates were analysed by SDS-PAGE and Western blotting. The blots were probed with anti-phosphotyrosine (anti-PY) mAb 4G10 (upper blot) and re-probed with anti-DDR1 Abs (lower blot). The experiment was performed three times with very similar results.

**Figure S2, related to Figure 3.** Superposition of DDR1 (cyan, DS domain; green DS-like domain) and the DS domain pair of neuropilin-1 (Nrp1, magenta) (Vander Kooi et al., 2007). The DDR1 DS domain was fitted to the first DS domain (b1) of Nrp1. The DDR1 DS-like domain and the second DS domain (b2) of Nrp1 are related by a ~60° rotation about a vertical axis.

**Figure S3, related to Figure 3.** Alignment of selected DDR1 and DDR2 sequences (*Homo sapiens* DDR1, Q08345; *Mus musculus* DDR1, Q03146; *Danio rerio* DDR1, XP\_001345829; *Xenopus tropicalis* DDR1, XP\_002939505; *Homo sapiens* DDR2, Q16832; *Mus musculus* DDR2, Q62371; *Danio rerio* DDR2, XP\_684261; *Xenopus tropicalis* DDR2, XP\_002933824). The numbers above the alignment refer to the human DDR1 sequence. Conserved residues are in bold and cysteines are in orange. Predicted *N*-linked glycosylation sites are underlined. The secondary structure elements of the DDR1 structure are indicated above the alignment. Red inverted triangles indicate key collagen-binding residues in DDR2 (Carafoli et al., 2009). Magenta filled circles indicate calcium ligands in DDR1. Pink

diamonds indicate residues contributing to the conserved surface patch in the DS domain. Orange inverted triangles indicate residues involved in 3E3 Fab binding ( $>10 \text{ \AA}^2$  reduction in solvent accessibility upon Fab binding). The seven linear and non-conservative human-to-mouse substitutions in the DS-like domain are boxed in blue and labelled mut1-7.

**Figure S4, related to Figure 6.** Mean fluorescence values of the flow cytometry data shown in **Figure 6A**. DDR1b wild-type or the indicated DDR1 mutants were transiently expressed in HEK293 cells. The cells were stained on ice with  $10 \mu\text{g/ml}$  of the indicated anti-DDR1 mAbs or mouse IgG1 isotype control Ab followed by FITC-conjugated goat-anti mouse IgG and analysis by flow cytometry.
